# Supplementary material for: Training Machine Learning Algorithms Using Remote Sensing and Topographic Indices for Corn Yield Prediction
Source: MDPI journal article supplement (doi:10.3390/rs14236171), 2022-12-06
Supplement: s1 [file s1]

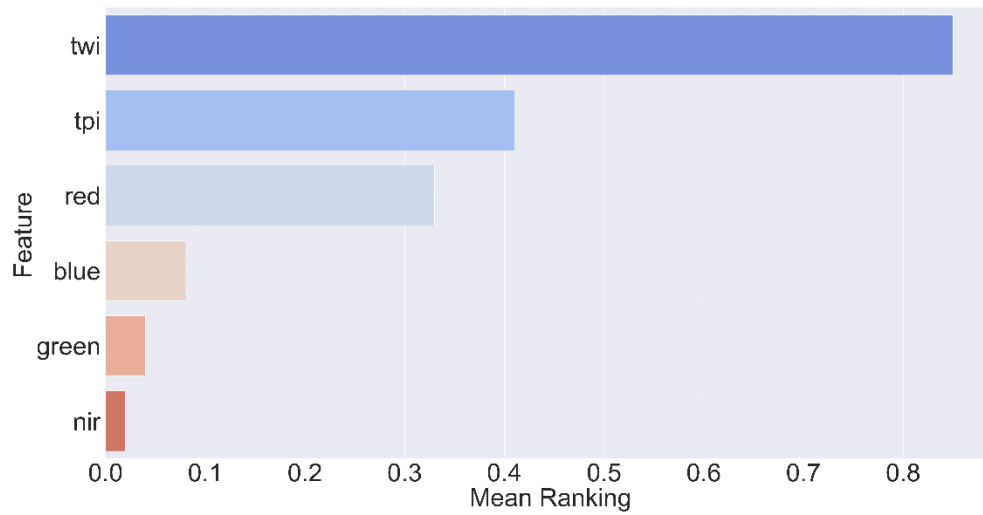

**Figure S1.** Feature importance ranking using recursive feature elimination (RFE).

**Table S1.** Krigin interpolation parameters.

| Variable   | Model       | Nugget  | Sill    | Range   | RMSE     | R <sup>2</sup> |
|------------|-------------|---------|---------|---------|----------|----------------|
| Elevation_ | Spherical   | 0.19    | 9.532   | 352.122 | 0.462    | 0.994          |
| Yield 2018 | Exponential | 110.284 | 414.269 | 297.772 | 1003.949 | 0.974          |
| Yied 2019  | Exponential | 152.817 | 378.363 | 307.063 | 805.324  | 0.955          |
